# Supplementary material for: A Proteomic Analysis of Individual and Gender Variations in Normal Human Urine and Cerebrospinal Fluid Using iTRAQ Quantification
Source: PubMed Central journal article supplement (PMC4519152; doi:10.1371/journal.pone.0133270), 2015-07-29

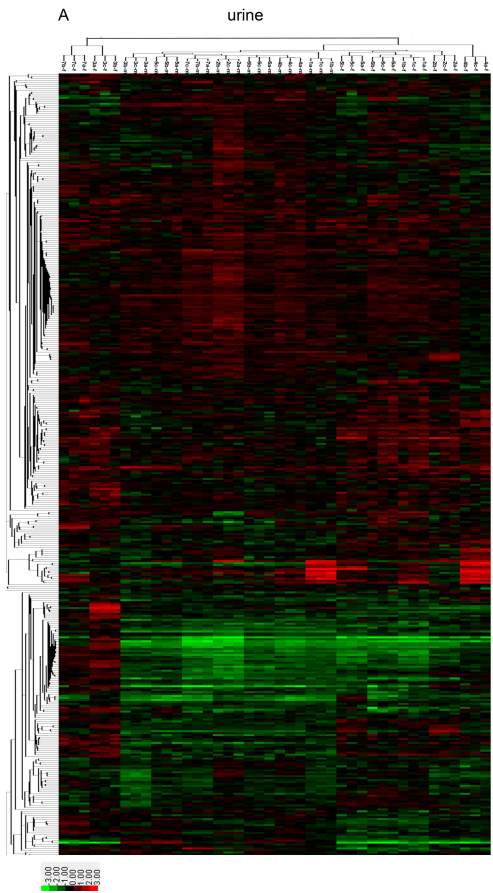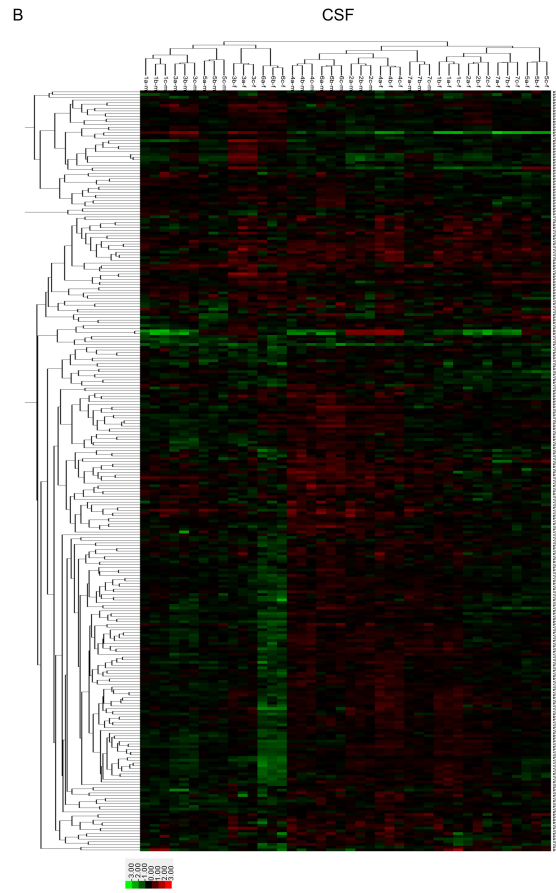

Supplement: pone.0133270.s003.pdf [file pone.0133270.s003.pdf]
